# Supplementary material
Source: PubMed Central journal article supplement (PMC2894581)
Supplement: NIHMS211735-supplement-01.pdf [file NIHMS211735-supplement-01.pdf]

## **INVENTORY:**

### **I-A word file containing:**

Figure S1, related to Figure 2, and corresponding legend.

Figure S2, related to Figure 4, and corresponding legend.

Figure S3, related to Figure 5, and corresponding legend.

Figure S4, related to Figure 6, and corresponding legend.

Figure S5, related to Figure 7, and corresponding legend.

Supplemental Table II

Supplemental Table legends

Legends to supplemental movies

Supplemental Experimental Procedures

### **II-Excel file containing Supplemental Table I**

### **III-Multimedia Files**

Video 1, related to Figure 4

Video 2, related to Figure 4

Video 3, related to Figure 4

Video 4, related to Figure 4

Video 5, related to Figure 6

Video 6, related to Figure 6

Figure S1, related to Figure 2

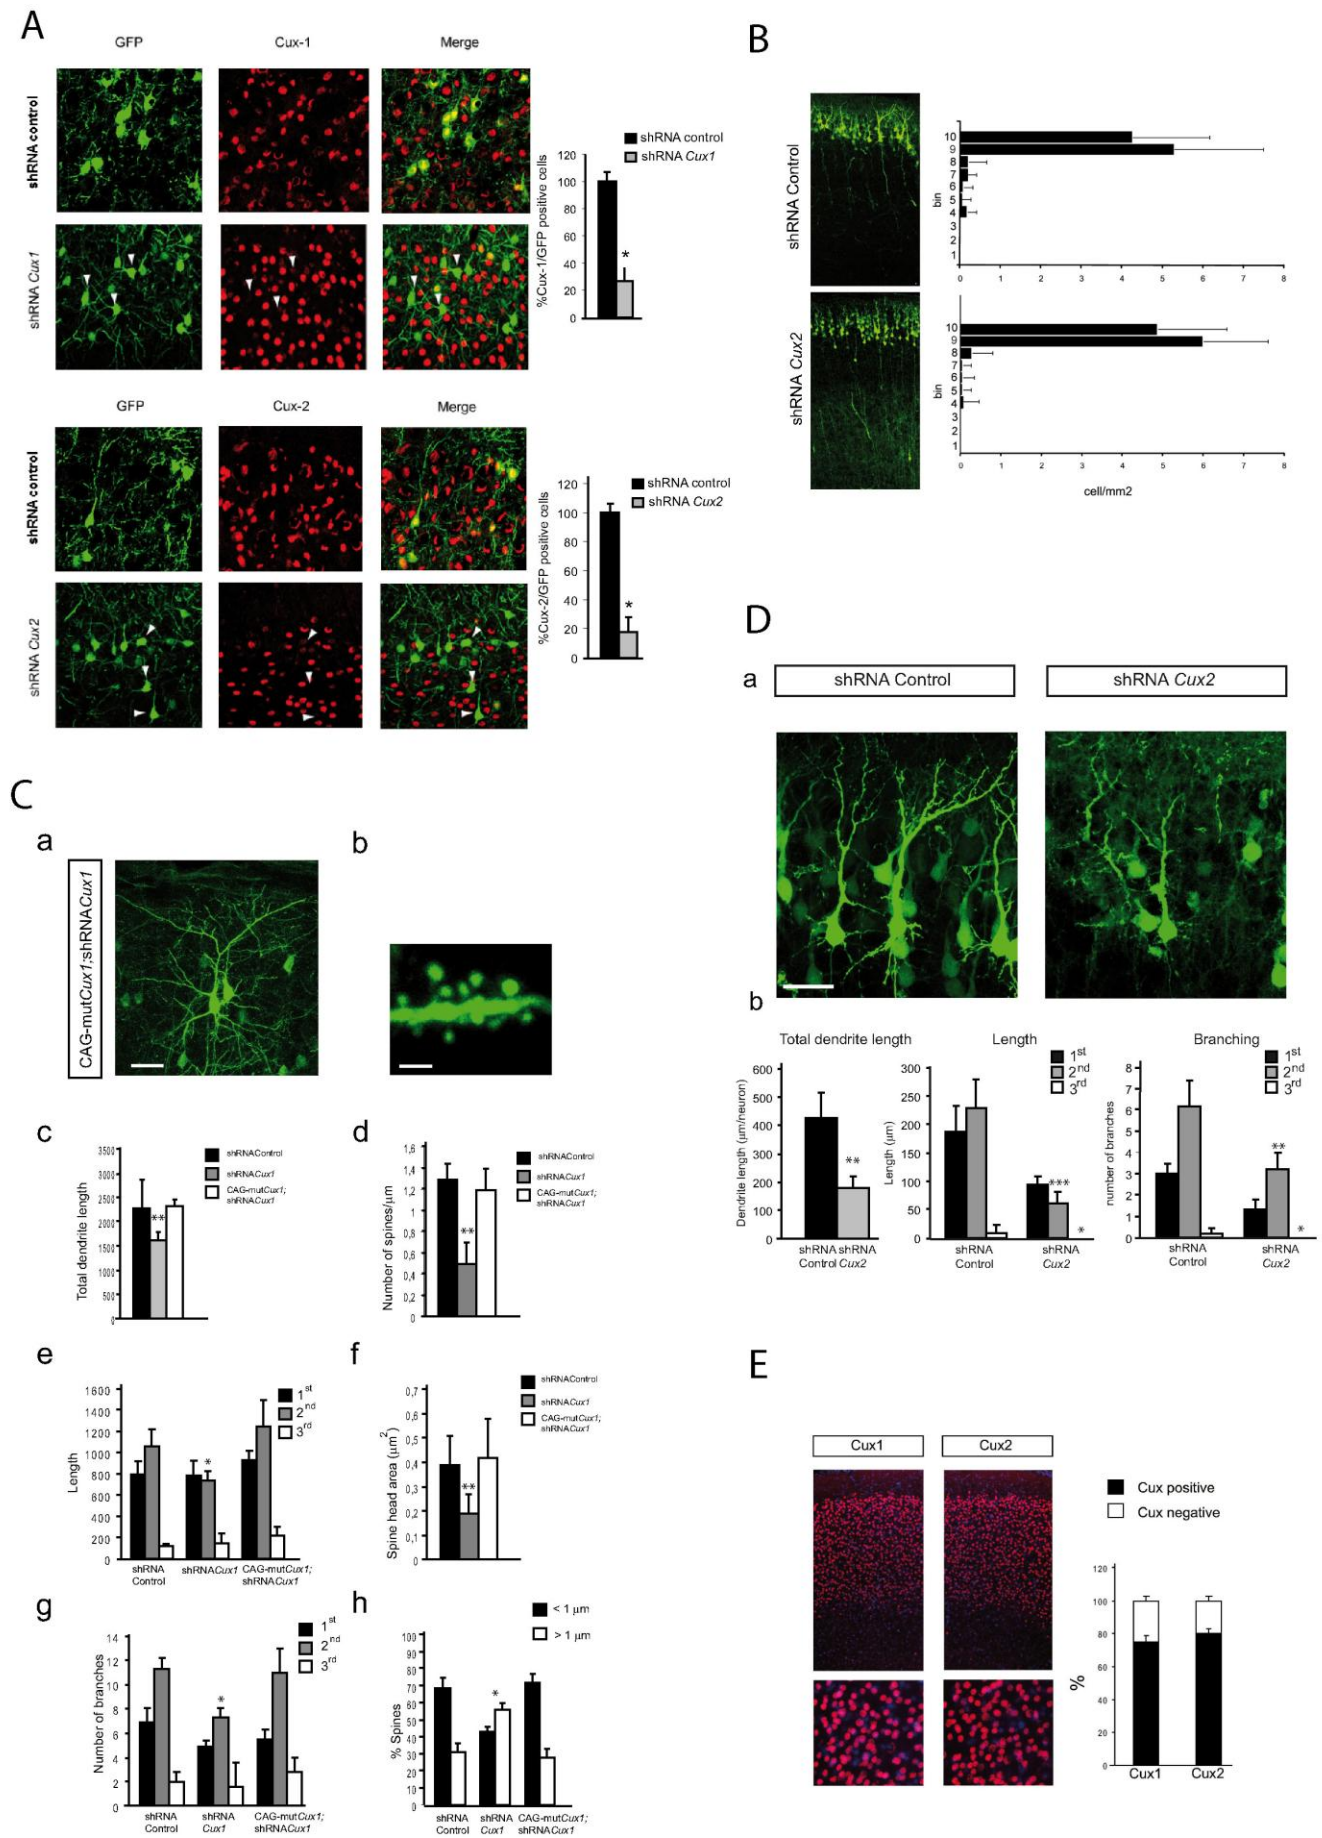

F

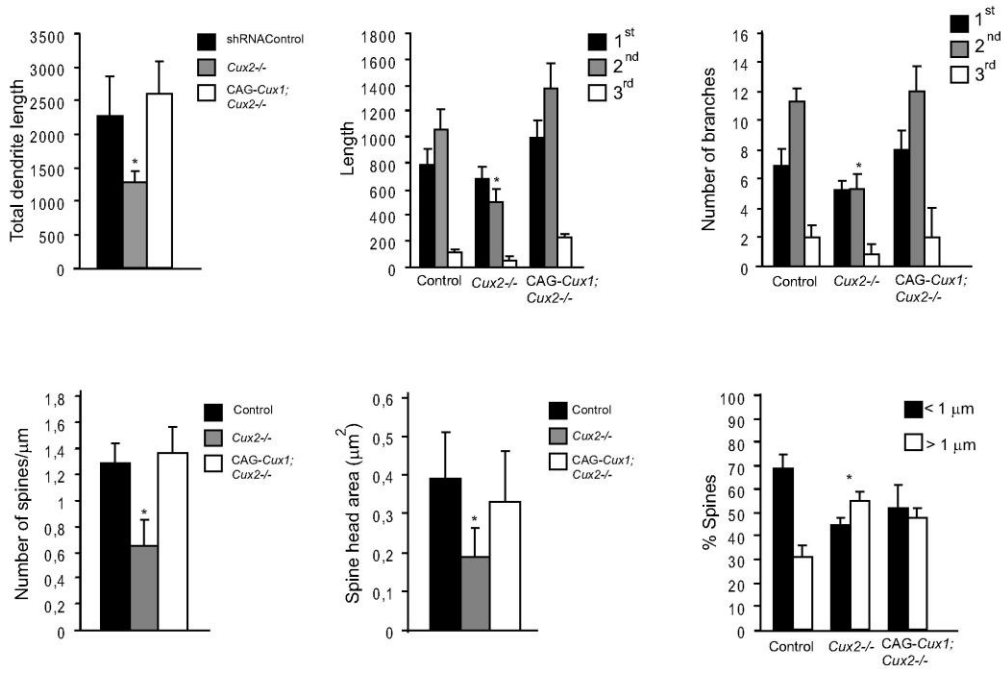

G

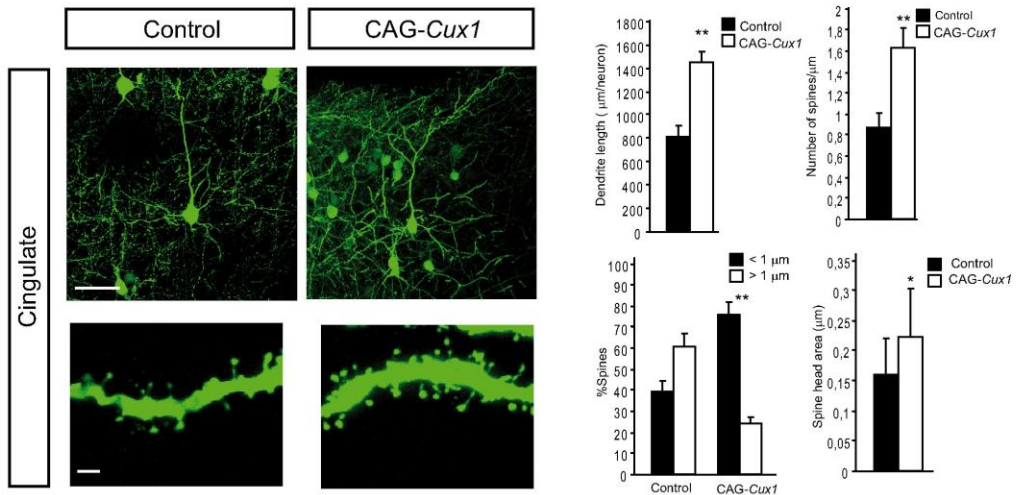

**Supplemental Figure 1. A) *In utero* electroporation of shRNA lentiviral constructs in E15.5 neuronal precursors efficiently suppresses Cux1 and Cux2 in P21 layer II-III neurons.** Expression of Cux1 or Cux2 protein (red) in GFP-expressing layer II-III neurons of the P21 cortex electroporated at E15.5. Cux proteins are expressed normally in GFP positive shRNA control targeted neurons but are down-regulated in neurons electroporated with shRNA targeting *Cux1* or *Cux2* (arrowheads). Graphs represent the proportion of GFP positive neurons expressing the indicated Cux protein. \*  $p < 0.001$  compared to control. **B) *In utero* electroporation of shRNA lentiviral constructs in E15.5 neuronal precursors does not affect the generation or migration of upper layer neurons.** The percentage of GFP positive neurons in each bin was quantified in P4 sections. Cells were located in the most superficial layers corresponding to their birth date **C) Dendrite branching and spine development is not affected in neurons coelectroporated with a mutated resistant form of Cux1 and shRNAs targeting Cux1.** Left panels show quantification of dendrite defects **a)** GFP positive neuron coelectroporated with a mutated resistant form of *Cux1* (mut*Cux1*) and shRNAs targeting *Cux1*. **c, e, g)** Quantitative analysis of dendritic arbors in GFP-positive neuron in layers II-III. shRNA control (n= 15), shRNA *Cux1* (n=15) and CAG-mut*Cux1*; shRNA*Cux1* (n=15). \*  $p < 0.01$ , and \*\*  $p < 0.001$  compared with control. **b)** dendritic spines of neurons coelectroporated with mut*Cux1* and shRNAs targeting *Cux1*. **d, f, h)** Quantitative analysis of dendritic spine defects.  $n \geq 15$  dendrite segments and  $n \geq 500$  spines for each sample. Equivalent results were obtained for mut*Cux2*. **D) Cux2 controls mechanisms of early dendritic differentiation.** *In vivo* knock-down of *Cux2* with shRNA lentiviral constructs decreases the number and length of dendrite processes of P4 differentiating layer II-III neurons. **a)** Representative confocal micrographs of a P4 cortex showing GFP-positive layer II-III neurons co-expressing control or shRNA *Cux2*. Bar represents 25  $\mu\text{m}$ . **b)** Quantitative analysis of dendrite morphology defects in *Cux2*-suppressed layer II-III neurons. \*  $p < 0.05$ , \*\*  $p < 0.01$ , and \*\*\*  $p < 0.001$  compared with control. **E) Cux1 and Cux2 protein staining in cortical sections indicates co-expression of both proteins in a subpopulation of cortical neurons.** Quantification of Cux1 or Cux2 positive upper layer neurons in the somatosensory cortex. **F) Over-expression of Cux1 in Cux2-/- upper layer neurons rescues dendritic arborization and spine defects.** Quantification of dendritic arbors, dendritic spine number and dendritic spine morphology. \*  $p < 0.001$ , compared with control. **G) Dendritic arborization and spine formation in neurons of the cingulate cortex is increase upon Cux1 overexpression.** Upper panels show representative confocal images of GFP positive neurons and spines of the cingulate cortex electroporated with control plasmids or CAG-*Cux1*. Bar represents 25  $\mu\text{m}$  (upper panels) and 2,5  $\mu\text{m}$  (lower panels). Graphs show quantification of dendritic arbors, dendritic spine number and dendritic spine morphology. \*  $p < 0.005$ , \*\*  $p < 0.001$ , compared with control.

Figure S2 related to Figure 4

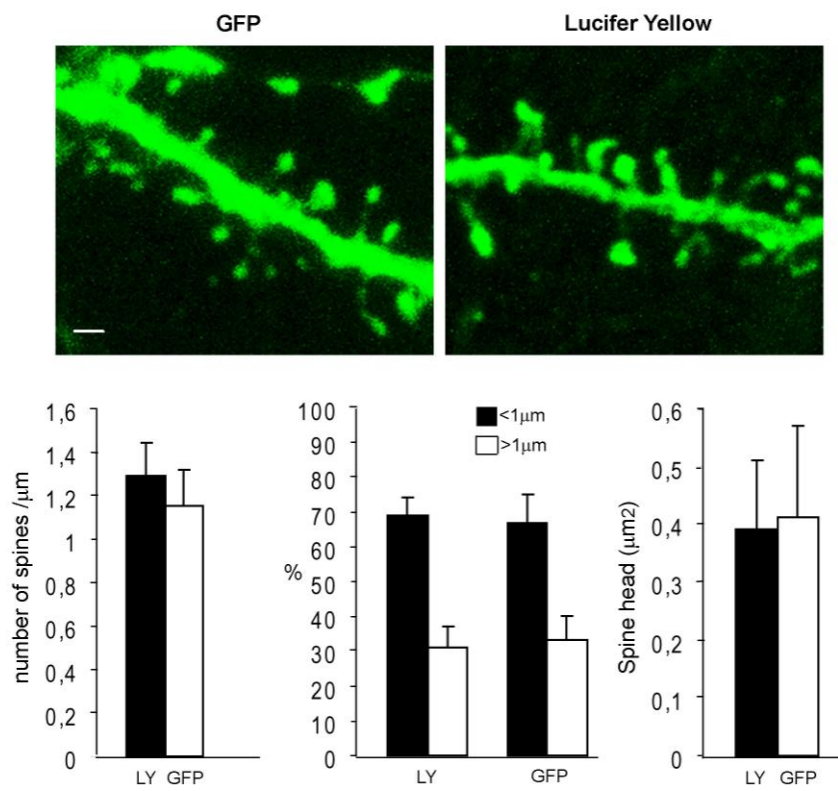

**Supplemental Figure 2. Analysis of GFP label dendritic spines in electroporated upper layer neurons compared to Luciferase Yellow (LY) microinjected cells.** Representative micrographs showing confocal images of dendritic spines of GFP-positive and Luciferase Yellow (LY) layer II-III neurons in P21 animals. GFP in the P21 cortex was induced by *in utero* electroporation of E15.5 neuronal precursors. Graphs represent the quantitative analysis of dendritic spine numbers, dendritic spine length and morphology. Bar represents 1  $\mu\text{m}$ . No significant differences were found.

**Figure S3 related to Figure 5**

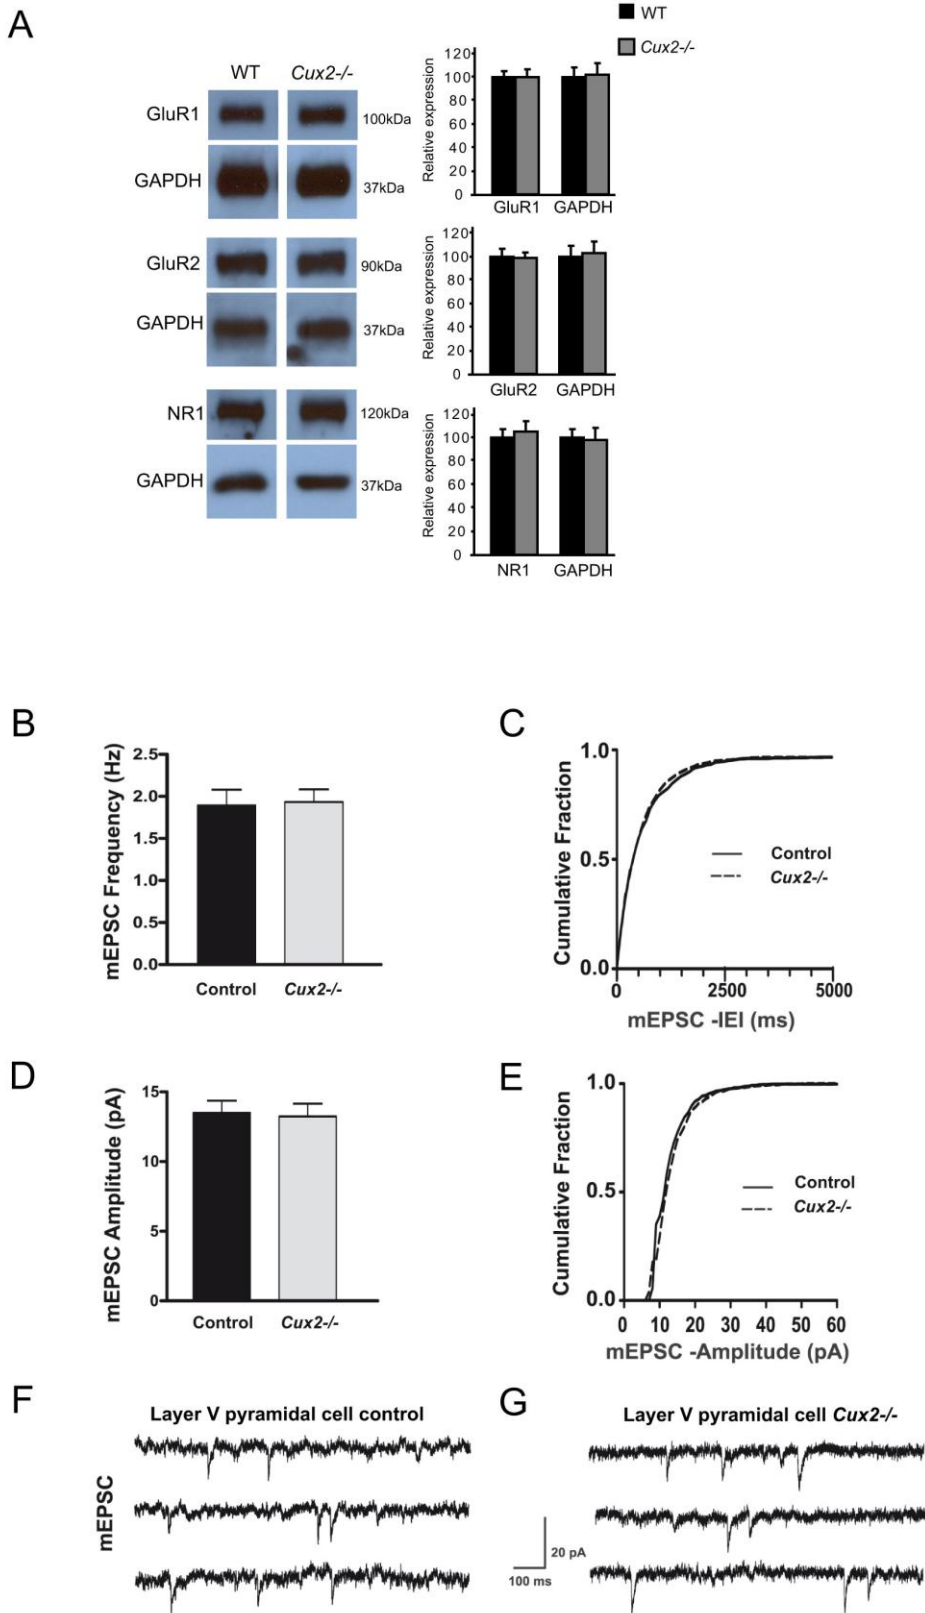

**Supplemental Figure 3. A) Western blot analysis of the expression of GluR1, GluR2 and NR1 (NMDAR1) in total cortical lysates.** WT (n=3) and *Cux2*<sup>-/-</sup> (n=3). Graphs show the mean and SD signal quantification of the relative amount of protein in WT and *Cux2*<sup>-/-</sup> cortices. GAPDH is shown as control. **B-G) mEPSC amplitude and frequency in layer V pyramidal cells: B)** Average frequency of mEPSC of layer V pyramidal cells from *Cux2*<sup>+/-</sup> and *Cux2*<sup>-/-</sup> mice. Average frequency of mEPSC in layer V pyramidal cells did not differ between *Cux2*<sup>+/-</sup> and *Cux2*<sup>-/-</sup> mice ( $p > 0.5$ , Student's unpaired t test,  $n = 15$  and  $15$  cells, respectively). **C) Cumulative fraction curves of interevent intervals (IEIs) for mEPSC of layer V pyramidal cells.** Data shows no difference between *Cux2*<sup>+/-</sup> and *Cux2*<sup>-/-</sup> mice ( $p > 0.5$ , K-S test). **D) Average amplitude of mEPSC in layer V pyramidal cells.** No differences were found between *Cux2*<sup>+/-</sup> and *Cux2*<sup>-/-</sup> mice ( $p > 0.5$ , Student's, unpaired t test,  $n = 15$  and  $15$  cells, respectively). **E) Cumulative fraction curves of amplitude of layer V pyramidal** were similar for both *Cux2*<sup>+/-</sup> and *Cux2*<sup>-/-</sup> mice ( $p > 0.5$ , K-S test). **F, G) Representative traces of mEPSC from layer V pyramidal cells of *Cux2*<sup>+/-</sup> and *Cux2*<sup>-/-</sup> mice.** Data in bar graphs depict mean  $\pm$  SEM; *Cux2*<sup>+/-</sup>: black bars; *Cux2*<sup>-/-</sup>: gray bars. IEI: Interevent interval. mEPSC: miniature excitatory postsynaptic currents.

**mEPSC frequency and amplitude (mean  $\pm$  SEM)**

| Layer V         | <i>Cux2</i> <sup>+/-</sup> | <i>Cux2</i> <sup>-/-</sup> |
|-----------------|----------------------------|----------------------------|
| mEPSC frequency | 1.90 $\pm$ 0.19 (n=15)     | 1.94 $\pm$ 0.15 (n=15)     |
| mEPSC amplitude | 13.50 $\pm$ 0.87 (n=15)    | 13.25 $\pm$ 0.91 (n=15)    |



**Figure S4 related to Figure 6**

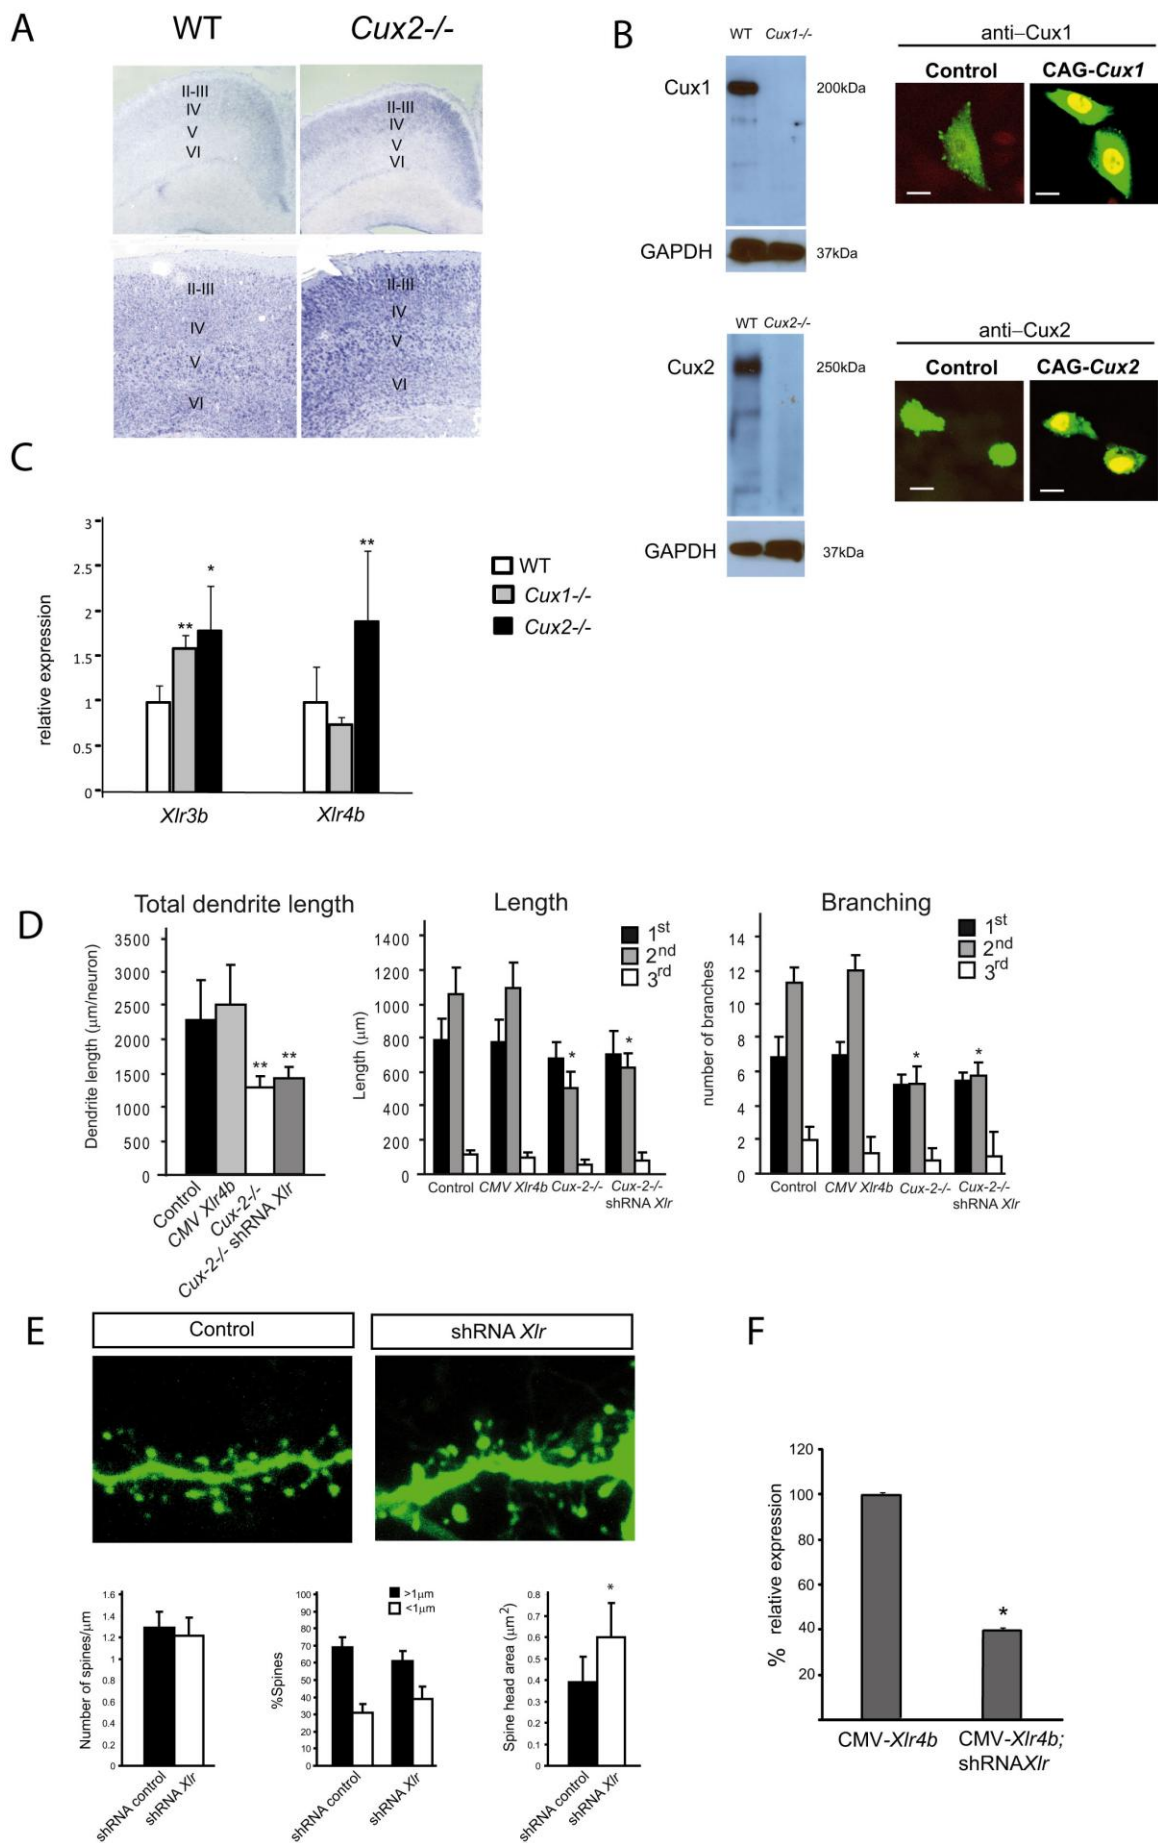

G

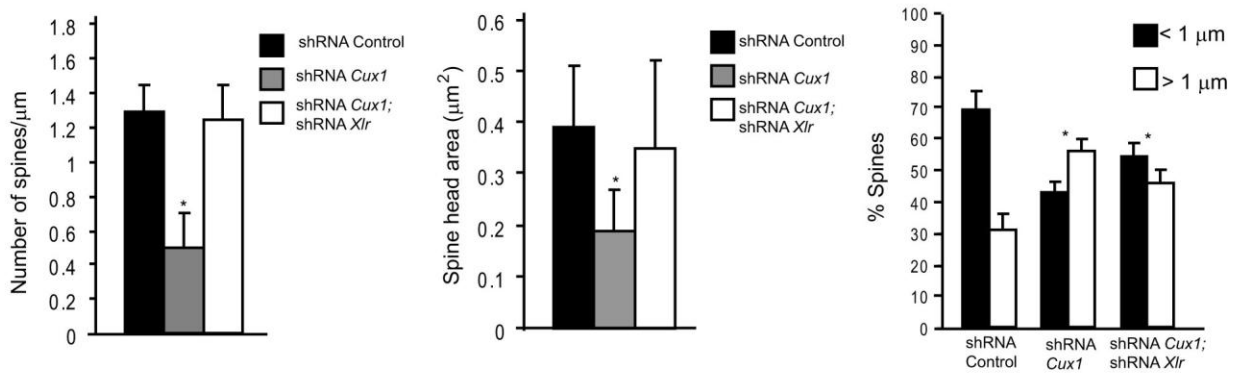

H

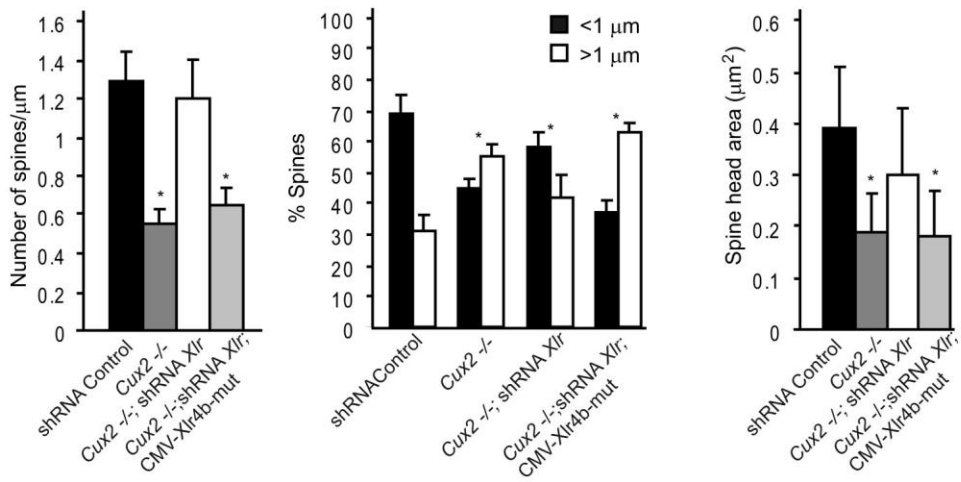

**Supplemental Figure 4. A) *Xlr4* expression in the cortex.** Expression patterns of *Xlr* genes in different brain regions have been well characterized by RT-PCR (Raefski and O'Neill 2005. Nat Genetics 37:620; Davies et al., 2005. Nat Genetics 37:625). The detailed study of the expression patterns of each *Xlr* gene by *insitu* hybridization is hindered by the high sequence homology of their coding and non coding regions. *In situ* hybridization with a probe for *Xlr4a*, *b* and *c* shows mRNA expression in P2 (upper panels) and adult (lower panels) WT and *Cux2*<sup>-/-</sup> cortex. Specific signal was weak in the cortex of WT animals, and background was higher in adult animals. At P2, cingulate cortex, where *Cux1* expression is weaker, gave higher signal than somatosensory areas. In the *Cux2* knock out expression of *Xlr4* mRNAs is increased in the upper layer neurons **B) Characterization of anti-*Cux1* and anti-*Cux2* antibodies.** (Left) We confirm that antibodies used for ChIP experiments specifically recognize Cux proteins in lysates from WT cortex but not from *Cux1*<sup>-/-</sup> or *Cux2*<sup>-/-</sup> cortex. (Right) Anti-*Cux1* and anti-*Cux2* antibodies also specifically reacted with *Cux1* or *Cux2* nuclear protein on COS transfected cells. Bar represents 5 $\mu$ m **C) *Cux1* and *Cux2* regulate *Xlr3b* and *Xlr4b* genes.** *Xlr3b* and *Xlr4b* expression in WT, *Cux1*<sup>-/-</sup> and *Cux2*<sup>-/-</sup> E18 cortex. Expression of *Xlr4b* and *Xlr3b* mRNA is shown in relation to one control sample normalized as 1. Expression of *Xlr* genes is shown as the ratio of the amounts of *Xlr* and *GAPDH* transcripts measured by Q-PCR in total RNA obtained from the cortex of control (*Cux1*<sup>+/+</sup>; *Cux2*<sup>+/+</sup> or *Cux1*<sup>+/-</sup>; *Cux2*<sup>+/+</sup> or *Cux1*<sup>+/+</sup>; *Cux2*<sup>+/-</sup>) (n=5), *Cux1*<sup>-/-</sup> (n=3) and *Cux2*<sup>-/-</sup> (n=5) animals. \* p<0.05 and \*\*p<0.01. RT-PCR analysis has shown that dynamic imprinted patterns regulate the developmental expression of *Xlr* genes in different brain regions (Davies et al., 2005; Raefski and O'Neill, 2005). **D) Overexpression or knock down of *Xlr* genes in WT or *Cux2*<sup>-/-</sup> upper layer neurons does not affect dendritic branching.** Dendritic branching and length was evaluated in each condition. CMV empty vector or shRNA *Xlr* alone gave equal results did not affect branching and are represented as control. \* p<0.01; \*\* p<0.001 compared to control. **E) Knock down of *Xlr* genes in WT upper layer neurons increases the surface of the dendritic spine head.** The number, length and the surface area of the head of dendritic spines were measured in the upper layer neurons generated after electroporation of the cortex of E15.5 WT embryos with shRNA lentiviral construct targeting *Xlr* genes. \*\* p<0.05 **F) Efficient knock down of *Xlr4b* using shRNA lentiviral constructs.** *Xlr4b* expression was measured by Q-PCR in COS1 cells co-transfected with CMV-*Xlr4b* and a combination of three anti-*Xlr* shRNA lentiviral constructs described in Experimental Procedures. \* p<0.05. **G) Characterization of dendritic spine number and morphology in layer II-III neurons co-electroporated with shRNAs targeting *Xlr* genes and *Cux1*.** n $\geq$  15 dendrite segments and n $\geq$  500 spines for each sample.\* p<0.001 compared to control shRNA. **H) Number and morphology of dendritic spines is not affected in neurons coelectroporated with a mutated resistant form of *Xlr4b* and shRNAs targeting *Xlr*.** The number, length and the surface area of the head of dendritic spines were measured in the upper layer neurons generated after electroporation of the cortex of E15.5. n $\geq$  15 dendrite segments and n $\geq$  500 spines for each sample. \* p<0.001 compare to shRNA control.

Figure S5 related to Figure 7

A

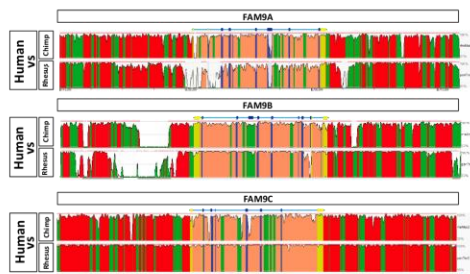

| Gene   | CDP BS Position (From ATG) | Genomic Location | ALIGNMENT                                                                                                                                                                |
|--------|----------------------------|------------------|--------------------------------------------------------------------------------------------------------------------------------------------------------------------------|
| hFAM9A | + 5.975                    | Intronic         | H. Sapiens<br>P. Pygmaeus<br>M. Mulatta<br>CC TAGTGTTCATTATTGGAA CCG<br>CC TAGTGTTCATTACTGGAACG<br>CC TAGTGTTCATTATTGGAA CCG                                             |
| hFAM9A | + 1.317                    | Intronic         | H. Sapiens<br>P. Pygmaeus<br>M. Mulatta<br>ACGCAATTAATCTATATAAC<br>ACGCAATTAATCTATATAAC<br>ACGCAATTAATCTATATAAC                                                          |
| hFAM9B | + 15.924                   | 3'Upstream       | H. Sapiens<br>P. Pygmaeus<br>M. Mulatta<br>-CCCAATAACCTATAG<br>-CCCAATAACCTATAG<br>-CCCAATAACCTATGT                                                                      |
| hFAM9B | + 14.073                   | 3'Upstream       | H. Sapiens<br>P. Throg.<br>P. Pygmaeus<br>M. Mulatta<br>CTGAAATGATCAATCATTATTAGCT<br>CTGAAATGATCAATCATTATTAGCT<br>CTGAAATGATCAATCATTATTAGCT<br>CTGAAATGATCAATCATTATTAGCT |
| hFAM9B | + 7.269                    | Intronic         | H. Sapiens<br>P. Throg.<br>P. Pygmaeus<br>M. Mulatta<br>AAACTATAATCAATACATGGAGCTC<br>AAACTATAATCAATACATGGAGCTC<br>AAACTATAATCAATACATGGAGCTC<br>AAAGATAATCAATACATGGAGCTC  |
| hFAM9B | - 6.447                    | 5'Upstream       | H. Sapiens<br>P. Throg.<br>P. Pygmaeus<br>M. Mulatta<br>CACAAAGTTAATCAATTCTGA<br>CACAAAGTTAATCAATTCTGA<br>CACAAAGTTAATCAATTCTGA<br>CACAAAGTTAATCAATTCTGA                 |
| hFAM9B | - 7.048                    | 5'Upstream       | H. Sapiens<br>P. Throg.<br>P. Pygmaeus<br>M. Mulatta<br>ACCTTA-TTGATCAGCATAT<br>ACCTTA-TTGATCAGCATAT<br>ACCTTA-TTGATCAGCATAT<br>ACCTTA-TTGATCAGCATAT                     |
| hFAM9C | + 15.771                   | 3'Upstream       | H. Sapiens<br>P. Throg.<br>P. Pygmaeus<br>M. Mulatta<br>TGACTATAGATTATATTTTA<br>TGACTATAGATTATATTTTA<br>TGACTATAGATTATATTTTA<br>TGACTATAGATTATATTTTA                     |
| hFAM9C | - 5.900                    | 5'Upstream       | H. Sapiens<br>P. Throg.<br>P. Pygmaeus<br>M. Mulatta<br>TCAGTATGGATTATATTTTC<br>TCAGTATGGATTATATTTTC<br>TCAGTATGGATTATATTTTC<br>TCAGTATGGATTATATTTTC                     |

B

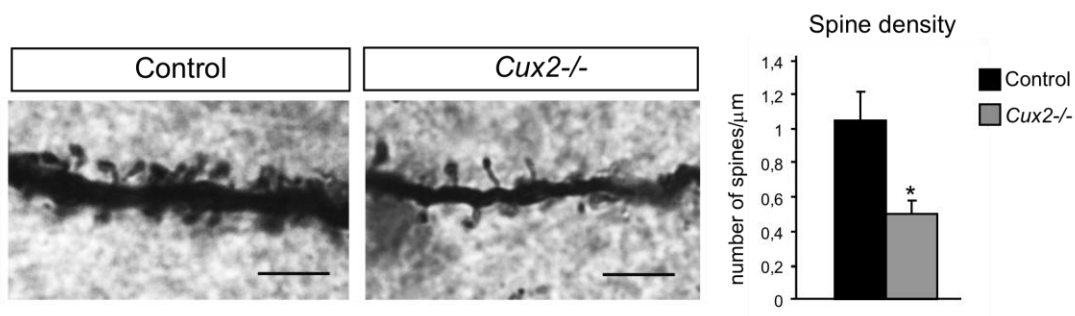

**Supplemental Figure 5. A) Analysis of Cux1 and Cux2 consensus binding sites in FAM9A, B, C genes.** The upper panels show the analysis of conserved regions in *FAM9A*, *B* and *C* genes in primates and humans. The lower table shows conserved Cux binding sites found in primates. **B) Dendritic spines defects in the prefrontal cortex.** Representative micrographs showing dendritic spines of Golgi-Cox stained neurons in the prefrontal cortex of WT and *Cux2*<sup>-/-</sup> mice. Bars represent 10  $\mu$ m. The histogram shows the quantification of spine density (n= 10; \* p< 0.05).

**Table II**

| GO ID      | GO term                                                         | GO category        | GO term in refseq  | GO in dataset | p-value | adj. pvalue |
|------------|-----------------------------------------------------------------|--------------------|--------------------|---------------|---------|-------------|
| GO:0008386 | cholesterol monooxygenase (side-chain-cleaving) activity        | molecular function | 1                  | 1             | 0,0058  | 0,0112      |
| GO:0042497 | triacylated lipoprotein binding                                 |                    | 1                  | 1             | 0,0058  | 0,0112      |
| GO:0019770 | IgG receptor activity                                           |                    | 2                  | 1             | 0,0087  | 0,0162      |
| GO:0016491 | oxidoreductase activity                                         |                    | 641                | 6             | 0,0109  | 0,0202      |
| GO:0005132 | interferon-alpha/beta receptor binding                          |                    | 3                  | 1             | 0,0115  | 0,0207      |
| GO:0003998 | acylphosphatase activity                                        |                    | 4                  | 1             | 0,0144  | 0,0249      |
| GO:0004528 | phosphodiesterase I activity                                    |                    | 4                  | 1             | 0,0144  | 0,0249      |
| GO:0004551 | nucleotide diphosphatase activity                               |                    | 4                  | 1             | 0,0144  | 0,0249      |
| GO:0016504 | protease activator activity                                     |                    | 4                  | 1             | 0,0144  | 0,0249      |
| GO:0019208 | phosphatase regulator activity                                  |                    | 4                  | 1             | 0,0144  | 0,0249      |
| GO:0004090 | carbonyl reductase (NADPH) activity                             |                    | 5                  | 1             | 0,0173  | 0,0291      |
| GO:0042809 | vitamin D receptor binding                                      |                    | 5                  | 1             | 0,0173  | 0,0291      |
| GO:0019864 | IgG binding                                                     |                    | 6                  | 1             | 0,0201  | 0,0332      |
| GO:0004029 | aldehyde dehydrogenase (NAD) activity                           |                    | 8                  | 1             | 0,0258  | 0,0413      |
| GO:0000146 | microfilament motor activity                                    |                    | 9                  | 1             | 0,0286  | 0,0442      |
| GO:0046966 | thyroid hormone receptor binding                                |                    | 9                  | 1             | 0,0286  | 0,0442      |
| GO:0005932 | basal body                                                      | cellular component | 9                  | 2             | 0,0004  | 0,0009      |
| GO:0045335 | phagocytic vesicle                                              |                    | 1                  | 1             | 0,0058  | 0,0112      |
| GO:0016459 | myosin                                                          |                    | 43                 | 2             | 0,0075  | 0,0144      |
| GO:0009288 | flagellum (sensu Bacteria)                                      |                    | 2                  | 1             | 0,0087  | 0,0162      |
| GO:0042105 | alpha-beta T cell receptor complex                              |                    | 4                  | 1             | 0,0144  | 0,0249      |
| GO:0005859 | muscle myosin                                                   |                    | 8                  | 1             | 0,0258  | 0,0413      |
| GO:0030016 | myofibril                                                       |                    | 8                  | 1             | 0,0258  | 0,0413      |
| GO:0042101 | T cell receptor complex                                         |                    | 8                  | 1             | 0,0258  | 0,0413      |
| GO:0005786 | signal recognition particle (sensu Eukaryota)                   |                    | 10                 | 1             | 0,0314  | 0,0484      |
| GO:0042535 | positive regulation of tumor necrosis factor-alpha biosynthesis |                    | biological process | 10            | 2       | 0,0005      |
| GO:0001747 | eye development (sensu Mammalia)                                | 35                 |                    | 2             | 0,0052  | 0,0102      |
| GO:0007522 | visceral muscle development                                     | 1                  |                    | 1             | 0,0058  | 0,0112      |
| GO:0042495 | detection of triacylated bacterial lipoprotein                  | 1                  |                    | 1             | 0,0058  | 0,0112      |
| GO:0043462 | regulation of ATPase activity                                   | 1                  |                    | 1             | 0,0058  | 0,0112      |
| GO:0008152 | metabolism                                                      | 560                |                    | 6             | 0,0058  | 0,0112      |
| GO:0008150 | biological_process                                              | 1192               |                    | 9             | 0,0073  | 0,014       |
| GO:0001788 | antibody-dependent cellular cytotoxicity                        | 2                  |                    | 1             | 0,0087  | 0,0162      |
| GO:0001812 | positive regulation of type I hypersensitivity                  | 2                  |                    | 1             | 0,0087  | 0,0162      |
| GO:0045637 | regulation of myeloid cell differentiation                      | 2                  |                    | 1             | 0,0087  | 0,0162      |
| GO:0046849 | bone remodeling                                                 | 2                  |                    | 1             | 0,0087  | 0,0162      |
| GO:0001805 | positive regulation of type III hypersensitivity                | 3                  |                    | 1             | 0,0115  | 0,0207      |
| GO:0001820 | serotonin secretion                                             | 3                  |                    | 1             | 0,0115  | 0,0207      |
| GO:0002027 | cardiac chronotropy                                             | 3                  |                    | 1             | 0,0115  | 0,0207      |
| GO:0007090 | regulation of S phase of mitotic cell cycle                     | 3                  |                    | 1             | 0,0115  | 0,0207      |
| GO:0030502 | negative regulation of bone mineralization                      | 3                  |                    | 1             | 0,0115  | 0,0207      |
| GO:0042590 | antigen presentation, exogenous antigen via MHC class I         | 3                  |                    | 1             | 0,0115  | 0,0207      |
| GO:0048739 | cardiac muscle fiber development                                | 3                  |                    | 1             | 0,0115  | 0,0207      |
| GO:0051146 | striated muscle cell differentiation                            | 3                  |                    | 1             | 0,0115  | 0,0207      |
| GO:0007160 | cell-matrix adhesion                                            | 59                 |                    | 2             | 0,0135  | 0,0242      |
| GO:0001798 | positive regulation of type IIa hypersensitivity                | 4                  |                    | 1             | 0,0144  | 0,0249      |
| GO:0006614 | SRP-dependent cotranslational protein targeting to membrane     | 4                  |                    | 1             | 0,0144  | 0,0249      |
| GO:0035162 | embryonic hemopoiesis                                           | 4                  |                    | 1             | 0,0144  | 0,0249      |
| GO:0050974 | detection of mechanical stimulus during sensory perception      | 4                  |                    | 1             | 0,0144  | 0,0249      |
| GO:0001701 | embryonic development (sensu Mammalia)                          | 63                 |                    | 2             | 0,0153  | 0,0263      |
| GO:0001539 | ciliary or flagellar motility                                   | 5                  |                    | 1             | 0,0173  | 0,0291      |
| GO:0030239 | myofibril assembly                                              | 5                  |                    | 1             | 0,0173  | 0,0291      |
| GO:0031032 | actomyosin structure organization and biogenesis                | 5                  |                    | 1             | 0,0173  | 0,0291      |
| GO:0051090 | regulation of transcription factor activity                     | 5                  |                    | 1             | 0,0173  | 0,0291      |
| GO:0006954 | inflammatory response                                           | 187                |                    | 3             | 0,0177  | 0,0298      |
| GO:0007093 | mitotic checkpoint                                              | 6                  |                    | 1             | 0,0201  | 0,0332      |
| GO:0042116 | macrophage activation                                           | 6                  |                    | 1             | 0,0201  | 0,0332      |
| GO:0042574 | retinal metabolism                                              | 6                  |                    | 1             | 0,0201  | 0,0332      |
| GO:0045410 | positive regulation of interleukin-6 biosynthesis               | 6                  |                    | 1             | 0,0201  | 0,0332      |
| GO:0006952 | defense response                                                | 200                |                    | 3             | 0,0211  | 0,0347      |
| GO:0000724 | double-strand break repair via homologous recombination         | 7                  |                    | 1             | 0,023   | 0,0375      |
| GO:0006590 | thyroid hormone generation                                      | 7                  |                    | 1             | 0,023   | 0,0375      |
| GO:0007512 | adult heart development                                         | 8                  |                    | 1             | 0,0258  | 0,0413      |
| GO:0030595 | immune cell chemotaxis                                          | 8                  |                    | 1             | 0,0258  | 0,0413      |
| GO:0001892 | embryonic placenta development                                  | 9                  |                    | 1             | 0,0286  | 0,0442      |
| GO:0002026 | cardiac inotropy                                                | 9                  |                    | 1             | 0,0286  | 0,0442      |
| GO:0006910 | phagocytosis, recognition                                       | 9                  |                    | 1             | 0,0286  | 0,0442      |
| GO:0007250 | activation of NF-kappaB-inducing kinase                         | 9                  |                    | 1             | 0,0286  | 0,0442      |
| GO:0030279 | negative regulation of ossification                             | 9                  |                    | 1             | 0,0286  | 0,0442      |
| GO:0030500 | regulation of bone mineralization                               | 9                  |                    | 1             | 0,0286  | 0,0442      |
| GO:0042088 | T-helper 1 type immune response                                 | 9                  |                    | 1             | 0,0286  | 0,0442      |
| GO:0045214 | sarcomere organization                                          | 9                  |                    | 1             | 0,0286  | 0,0442      |
| GO:0045576 | mast cell activation                                            | 9                  | 1                  | 0,0286        | 0,0442  |             |

**Supplemental Table I and II. Genes differentially expressed in *Cux2*<sup>-/-</sup> cortex. Table I.** Genes differentially expressed in WT cortex versus *Cux2*<sup>-/-</sup> cortex according to the analysis of gene expression microarrays. For analysis of gene expression, raw data were quantile normalized and expression values (log<sub>2</sub> transformed) were obtained for each probe. Next, differential expression was assessed using the linear modelling features of the limma package, a package of Bioconductor: <http://www.bioconductor.org/>. The M-value (M) is the value of the contrast, the log<sub>2</sub>-fold change between the two experimental conditions. Column t is the moderated t-statistics. pval is the p value associated of the moderated t-statistic. This value has to be adjusted for multiple testing. adj.pval: is the p value of the moderated t-statistic after some form of adjustment for multiple testing. **Table II.** Gene Ontology (GO) terms of genes differentially expressed in *Cux2*<sup>-/-</sup> cortex.

## Movies legends

**Supplemental video 1: 3D reconstruction of dendritic spines in upper layer neurons of WT mice.** 3D image reconstruction of GFP positive dendritic spines obtained from serial confocal sections.

**Supplemental video 2: 3D reconstruction of dendritic spines in upper layer neurons of *Cux2*<sup>-/-</sup> mice.** 3D reconstruction of GFP positive dendritic spines obtained from using serial confocal sections.

**Supplemental video 3: 3D reconstruction of dendritic spines in upper layer neurons after electroporation of shRNA targeting *Cux1*.** 3D reconstruction of GFP positive dendritic spines obtained from using serial confocal sections.

**Supplemental video 4: 3D reconstruction of dendritic spines in upper layer neurons after electroporation of shRNA targeting *Cux1* in *Cux2*<sup>-/-</sup> cortex.** 3D reconstruction of GFP positive dendritic spines obtained from using serial confocal sections.

**Supplemental video 5: 3D reconstruction of dendritic spines in upper layer neurons that over expressed *Xlr4b* in WT mice.** 3D reconstruction of GFP positive dendritic spines obtained from using serial confocal sections.

**Supplemental video 6: 3D reconstruction of dendritic spines in upper layer neurons after electroporation of shRNA targeting *Xlr* genes in *Cux2*<sup>-/-</sup> cortex.** 3D reconstruction of GFP positive dendritic spines obtained from using serial confocal sections.



## Supplemental Experimental Procedures

### *Electrophysiology*

*Slice preparation:* Acute brain slices were prepared from *Cux2*<sup>+/-</sup> and *Cux2*<sup>-/-</sup> mice (P20) (n=15). Briefly, the mice were decapitated and the brains were rapidly removed in 4°C oxygenated (95% O<sub>2</sub>-5% CO<sub>2</sub>) slicing artificial cerebrospinal fluid (sACSF) consisting of (in mM) 220 sucrose, 3 KCl, 1.25 NaH<sub>2</sub>PO<sub>4</sub>, 2 MgSO<sub>4</sub>, 26 NaHCO<sub>3</sub>, 2 CaCl<sub>2</sub>, and 10 dextrose (295–305 mosM). Coronal slices (300 μm thick) were cut in 4°C oxygenated slicing medium using a vibroslicer model VT1000S (Leica, Nussloch, Germany). The slices were immediately transferred to a holding chamber, in which they remained submerged in oxygenated normal recording (nACSF) consisting of (in mM) 124 NaCl, 3 KCl, 1.25 NaH<sub>2</sub>PO<sub>4</sub>, 1.2 MgSO<sub>4</sub>, 26 NaHCO<sub>3</sub>, 2 CaCl<sub>2</sub>, and 10 dextrose (295–305 mOsm). Slices were heated to 37°C, held at 37°C for 45 min, and then cooled to room temperature. For each experiment, an individual slice was gently transferred to a submersion-type recording chamber, in which it was continuously perfused with oxygenated recording medium at 33–35°C.

*Whole cell recording:* Whole cell voltage-clamp recordings were obtained from layer II-III pyramidal cell neurons visually identified using an IR-DIC video microscopy system (Nikon, Tokyo, Japan). Patch electrodes (3–7 MΩ) were pulled from 1.5 mm OD borosilicate glass capillary tubing (World Precision Instruments) using a micropipette puller (P-97; Sutter Instruments, Novato, CA), coated with silicone elastomer (Northants, UK), and fire polished. Intracellular patch pipette solution for whole cell voltage-clamp recordings contained (in mM) 135 CsCl<sub>2</sub>, 10 NaCl, 2 MgCl<sub>2</sub>, 10 HEPES, 10 EGTA, 2 Na<sub>2</sub>ATP, 0.2 Na<sub>2</sub>GTP, and 1.25 QX-314, 0.05% Lucifer yellow CH, adjusted to pH 7.2 with CsOH (285–290 mosM). During the recordings each slice was perfused with nACSF containing 1 μM bicuculline and 1 μM Tetrodotoxine (TTX) to isolate the miniature EPSC (mEPSC). Cells were held at -70mV and the voltage and current were recorded with a Multiclamp 700B amplifier (Molecular Devices) and monitored with an oscilloscope and with pClamp 10.0 software (Molecular Devices). Whole-cell voltage-clamp data were low-pass filtered at 1 kHz (-3 dB, eight-pole Bessel), digitally sampled at 20 kHz. Whole-cell access resistance was carefully monitored throughout the recording, and cells were rejected if values changed by more than 25% (or exceeded 20 MΩ); only recordings with stable series resistance of <20 MΩ were used for analysis. Whole-cell currents were analyzed using Mini Analysis 6.0.7 (Synaptosoft, Decatur, GA). Results are presented as mean ± SEM. To compare the results between cells from different animals, we used unpaired Student's *t*-test, and the cumulative probability curves with Kolmogorov-Smirnov (K.S.) statistical test, with significance level of *p* < 0.05.

### *Chromatin immunoprecipitation (ChIP):*

Primers for putative binding sites of Cux1 and Cux2 on Xlr4b gen (NC\_000086 REGION: 70450661..70467792) (-8858-(-8718): F-5'- CAAGACAGATGGGTTTCAAGG -3' and R-5'- CATGCTGGACATTGTTCTGG -3'; -6783-(-6661): F-5'- CAAGGGATGGTTTCTTACCC -3' and R-5'- CCGTAGTTTTTCATGGCAATC -3'; -6473-(-6374): F-5'- AGCTACATGTTTCCCGAAGG -3' and R-5'- GCACATTTGGGATGTCTTGC -3'; -1857-(-1761): F-5'- AACATCACTAGGCTCTTTCCAAG -3' and R-5'- ACAGGATGCTCCATTCTACCAC -3'; 726-804: F-5'- TGATCCCTTCCAGTTCGTTC -3' and R-5'- AACAGGCATCAGGTTTCCAC -3'; 2508-2605: F-5'- TTTGTTGTGTGGTGGGGTAG -3' and R-5'- AACTCTGCATGCACTGTGTG -3'; 6037-6131: F-5'- CGCCCTTTGTTTCTTGACTC -3' and R-5'- TGGGCCTTGTCTTACCATTG -3'; 6712-6837 F-5'- TCTTCCTTTTCCCCTTCCTC -3' and R-5'- CTGGAGAAGCATGACTGTATGG3'; 8002-8106: F-5'- AGCTTGCCTCCTGTGATTTC -3' and R-5'- TGACTCATGCCAACAAAGTCTG-3'). Q-PCR of serial dilutions of genomic DNA as template was run in parallel to verify linear relationship of Ct versus template and experimental samples.

Primers for putative binding sites of Cux1 and Cux2 on FAM9 genes: FAM9C +15771  
GTCGCCACAATCAGGATG; TCAAAAGATCTGCTGGGTGA; FAM9C -5900  
GCACAGAGTTGAGGGACCAC; GTGACATCCAGGGCCACTG; FAMA +1317  
TGAGGGGTACATGTGCAGGTT; GACACCTGGGCCTACTTGAG; FAMA +5975  
TATGGTCTTCCCTGCCTTCCA; TGGCTATGTTCTTGAGCGGTA; FAMB +14073  
TTGCAACTGCTGGATAACCAT; TCATTGCCCTTACCTTACAGC; FAMB +15924  
GATGGGTGCACCAAAAATCTC; TTTGGGGTCATTTTTATGTTC; FAMB +7269  
ATGTCACTGAAATCTGGCATT; GTTCACTGACAAACCACCACTT; FAMB -6447  
CCCACTGCTGCTGTAACAAA; CTGGAAAAGGCAAGGAACTG; FAMB -7048  
AGACATCTTTGAGAGGCCATT; GGCTGTCTGGGGAGTCATTA.

The immunoprecipitating antibodies for ChIP assay were: a goat polyclonal anti-Cux1 (CDP, C-20; sc-6327, Santa Cruz Biotechnology). This antibody has been previously characterized and used in previous reports for ChIP experiments (Tiveron et al. 2006. J Neurosci. 26(51): 13273; Brantley et al. 2003. Kidney Int. 63(4): 1240. Khanna-Gupta A, et al. 2003. Blood. 101(9): 3460). We demonstrated that this polyclonal stains nuclear protein specifically on layer II-III and IV of P0 cortex (not shown) and that it specifically recognizes the corresponding 200 kDa band on Western blot analysis performed on protein extracts from WT mice but not *Cux1*<sup>-/-</sup> animals (Fig S4B). The antibody also specifically react with Cux1 nuclear protein over-expressed in COS cells as assay by immunohistochemistry (Fig S4B) and Western-blot (not shown). The immunoprecipitating antibodies for Cux2 were the serum of a rabbit immunized against the full length Cux2 protein custom generated by Genovac (Freiburg, Germany) by genetic immunization that specifically recognizes nuclear Cux2 protein on COS transfected cells with CAG-Cux2 but not on control cells as assay by immunohistochemistry (Fig S4B) and Western-blot (not shown). It specifically reacts with a 250 kDa

protein band corresponding to Cux2 (Gingras et al., Gene 344, 273) by Western-blot of lysates of WT cortex but not *Cux2*<sup>-/-</sup> cortex (Fig S4B).

**Hairpin sequences:** The hairpin sequences for *Cux2* were CCGGCCGTTTACGTTTATTGTACTCGAGTACAACAATAAACGTAACGGTTTTTTG; CCGGGCTGACTATGAAGAGATTAAGTCTCGAGTTTAATCTCTTCATAGTCAGCTTTTTTG; CCGGCAATCCAGACTGTCCTTCATTCTCGAGAATGAAGGACAGTCTGGATTGTTTTTTG; CCGGCCGTTTACGTTTATTGTTGTACTCGAGTACAACAATAAACGTAACGGTTTTTTG The hairpins for Cux1 were CCGGGCAGCTCAAGCACAACATCTCGAGATGTTGTGCTTGATGAGCTGCTTTTTTG; CCGGGCCCTCAGCA TCCAAGAATTACTCGAGTAATTCTTGGATGCTGAGGGCTTTTTTG; CCGGGCCAAGAATAGCACACTCAAAGTCTCGAGAAGTCTTCTGTAGAAGCCAGGTTTTTTG. The hairpins for Xlr4 and Xlr3 were TGCTGTTGACAGTGAGCGCGGGATCATCAGGGATATTATATAGTGAAGCCACAGATGTATATAATATCC CTGATGATCCCATGCCTACTGCCTCGGA; TGCTGTTGACAGTGAGCGAGGATCATCAGGGATATTATATTAGTGAAGCCACAGATGTAATATAATATC CCTGATGATCCCTGCCTACTGCCTCGGA; TGCTGTTGACAGTGAGCGCGGAATATAGATGTAGACCAAAT AGTGAAGCCACAGATGTATTTGGTCTACATCTATATTCCATGCCTACTGCCTCGG.

**Phylogenetic analysis:** mouse and rat *Xlr4b* and *FAM9* genomic regions were aligned using mVista multiple alignment software. Sequences of Cor1 superfamily members were obtained from treefam (<http://www.treefam.org>), (acc number:TF328876) and aligned using software Clustalw (NCBI). Binding site search was performed using JASPAR and transfac data bases.

**Luciferase reporter assays.** Sequence containing *Xlr4b* regulatory regions (see below) corresponding to those identified in the Chip assays were cloned into the pGL4.23 luciferase vector (Promega). The dorsal telencephalon of E12.5 embryos was dissected; cells were dissociated and seeded onto 24 well Poly-Lys coated plates in Neurobasal media supplemented with B27 complement (Invitrogen). Cells were then co-transfected with the corresponding luciferase reporter constructs, CMV-renilla, and CAG-Cux1, CAG-Cux2 or CAG empty vector at a ratio of 10:1:6 using lipofectamine 2000 (Invitrogen). Luciferase and Renilla activity was measure two days after transfection using the Dual-Luciferase Reporter Assay System (Promega) and following the manufacture protocol. Renilla activity was used to normalize transfection. Relative expression of reporter constructs was determined by normalizing the ratio of reporter activity to the control CAG empty vector.

**Sequences of the cloned regulatory regions (Cux consensus binding sites in bold).**

**R1: A region of 1 Kb from -2437 to 1436 of the Xlr4b gen (NC\_000086 REGION: 70450661..70467792).**

CCAACAACCTCACTTAGATGTGACATAAATTTGGGATTGGAACCTTCATTTGGAGACAAGAGGTGTTTCAG  
TTGGGGCTCTGTCTCAAACATTATTTCAATTTAGATTTCCCTCCATAGATGTATATATTTTAGGAAGCTTCAA  
CTCTATTAGTTCTCCATACTACCCCTCAAATGGCCCTTAATTAGAGTTCTCTCTTCCCACATCCCCTTCTA  
CATCCCCTCTCCTACTCCTCCCCACTTGATCCCCTAATCCAGCCCCTGCATCTATGTATAACTATTAATT  
TTATTTTCTTTTCTATTGAGATCTATCCATACTCCCCAAGTCCCTTACTCTATATGTAAACTCTGTGGTT  
CTATGAATTGTGGCTTGGTTGTCATTCATTTAGCAGCTGATATCCACATGTAATAAATATGTATCATAT  
TTGTCTTTCTGGGTCTGGGATACCTCCCACAGGATCACTTTTTTTTTTCTAGATCCATCAATTTACCTGT  
GAATTTTCATGATTTTCAATTTTAAAGACTGAGTAATAATCAATTGTATAAATGTATCATATTTTATTT  
ATCCATTCTTATACTGAGAAACATCACTAGGCTCTTTCCAAGTTTTCACTATTATATAGAGAGCAGCAA  
TAAACATGGATGGGCAATTATCTCTGTGGTAGAATGGAGCATCCTGTGGGTATATGCCAAGAAGTGGT  
ATAGTTGGATCTTGAGATAGATTTATTTCCCAATTCTCTGAGAAACCCTCATATTGGGTCCAAGGTGGT  
TGAACAAGTTTGCCTCCACCATCAATGGAGGAGTGTCCATGTGTTCCAGTCTCACCAGCATGAGC  
GGTCACTTATGTTTTTGGTCTTAGCCATTCTGATGAGTATAAAATGGAATCTCGGGGTCGTTTTGACTTG  
CATTTCCCTGATGGTTAAGGATATTGAACATTTAATCATTCTCAGCCATTTGAATTTCCCTTTAGTGAGAA  
TTCTCTGGTTAGATCTGTACCATTGAGT

**Mutated R1:**

CCAACAACCTCACTTAGATGTGACATAACTTCGGTATCGGAACCTTCATTTGGAGACAAGAGGTGTTTCAG  
TTGGGGCTCTGTCTCAAACATTATTTCAATTTAGATTTCCCTCCATAGATGTATATATTTTAGGAAGCTTCAA  
CTCTATTAGTTCTCCATACTACCCCTCAAATGGCCCTTAATTAGAGTTCTCTCTTCCCACATCCCCTTCTA  
CATCCCCTCTCCTACTCCTCCCCACTTGATCCCCTAATCCAGCCCCTGCATCTATGTATAACTATTAATT  
TTATTTTCTTTTCCAATGGATAGGCAGCCAGACCCCCCAAGTCCCTTACTCTATATGTAAACTCTGTGGTT  
CTATGAATTGTGGCTTGGTTGTCATTCATTTAGCAGCTGATATCCACATGTAATAAATATGTATCATAT  
TTGTCTTTCTGGGTCTGGGATACCTCCCACAGGATCACTTTTTTTTGTATGAATTAACAGTTCACCTGTG  
AATGTCGTGCTTCCAGTACTTAAAGACTGAGTAAAAGCAGTTCTACAAATGTATCATATTTTATATAGC  
CCTTTTTGTAATGAGAAACATCACTAGGCTCTTTCCAAGTTTTCACTATTATATAGAGAGCAGCAATAAG  
CAAGGGTGCGCCATAATCTCTGTGGTAGAATGGAGCATCCTGTGGGTATATGCCAAGAAGTGGTATAGT  
TGGAACTCGAAATGGAATTTTTCCAATTCTCTGAGAAACCCTCATATTGGGTCCAAGGTGGTTGAACA  
AGTTTGCACCCCGACAATAAACGGGGGAGTGTCCATGTGTTCCAGTCTCACCAGCATGAGCGGTCACT  
TATGTTTTTGGTCTTAGCCATTCTGATGAGTATAAAATGGAATCTCGGGGTCGTTTTGACTTGCATTTCC  
TGATGGTTAAGGATATTGAACATTTAATCATTCTCAGCCATTTGAATTTCCCTTTAGTGAGAATTCTCTGG  
TTAGATCTGTACCATTGAGT

**R2: A region of 2,3 Kb from 5754 to 8254 of the Xlr4b gen (NC\_000086 REGION:  
70450661..70467792)**

CTCTTTCCCTCCATACTGGGGTTCATTGATAGTGTTACATACCTTTAAACGTCTTCTTTCTTTTCTTAGTGTT  
ACCATGTCAGGTAAACCTAACTACTAAATGAGCGTCTCCTTTAAGGATTCATTCATGGTTGTGGGTTCCT  
TTCAAAGCAGGAGTTGGTACATTGGTAAACATTGCCCAAAGTTATACTTACTGTTTTGGGGGAAGTTCTG  
ATTTTTATAGCATGGCTTTCTCCATAATCAGATTTCTTTTGGACAGTGACAAATCAATGTAGGAAGTC  
TATACGCCCTTTGTTTCTTACTCCTTGTGCTTTCTGCATTATTGAACTGTAATTATTCTTTTCCCCTGTGG  
ACAATTACAATGGTAAGACAAGGCCCATCAGCATGATGAGGCAAACTGTAAGTGAAGATAACAGTAT  
ATTGAGAATTAGCTACTGTTTTCAATGCATCCTATCCAATTCTTCTCAGCCTCTTTGAACTTGGCCAAGTA  
CATTTATATAGTTATTCTGGAATTAATTAAGTGTACGCTCAGATTCATTTTCTGGGTGTTGTTTAAAT  
GCCTTGTGTTCTGTTGAATTTCCCTCATCCAGGCTAATTGATATAGGTCCAAACAGCCGCGTGGAAGA  
ATTTATTCCATGTTCTGTAATACTTGGTGTACACTGGGATACATGTATGCAGAGCAGCCAATTTGAAGTG  
CTTCTGAGTCGTGGGTATCAGGCTGTAGTCTTGTGGGGGAAGCTTTTCAAATCACACTGCAGGTTTG  
AGGTAGCTGTTAGTCTAATCCTCAGTCAGGCTGCACTTCTGAGTACTCTCATTCTCTGTGTATGGTA  
ATACTGCAGACTGCTCAGACATCTCCCCCGCCCCGTCTTCCCTCAACTTTCTGTTTCTCCTCCTCCTTCC  
TTTCTCTTCTTCTCCTCTGTATCATCTTTAACTTCTTTCATATTTTCTTCTTCTTCTTCTTCTTCTTCT  
CCACTCCAATGTGTACGCATTTCCCTATTCTGCCTATAAGATTTTGTATTATATCCAGATTGCACAGTATA  
GCATCACCATAACAGTCATGCTTCTCCAGTCTTCTTTTGTTTTCTTCTTCTTCTTCTTCTTCTTCTTCT  
AGCCATAGGCATTAAGATTCATTTCACTTGCATAGCTCAGCAAGTTGGTCATCAGTTCTAATGCTAAAGT  
TTTGGGCTGTTTCTGGTTCTGCATTCATTTAAAGTTATTGAAATATGAAAGAAATAATTAATAGTTTTA  
TCATTTTCTATACCACATGTCACAAGAGTTGTTTATAGCAAGTATCTCTCTCTCTGTGGCCCTGGCTAG  
CCTGGAGCTCACTATGCAGTGGCTTTACTTGAAGTGTCACTGATCCTCCTGCCACTATTTTGGAGTGATG  
GAATTACAGGTACATTTACCAAGGTAATCTGCTTAGTGCAACAGGTTGATGTAGTGTCTTAATCC

**ATTCATTGTTGAACCTTCCGTCATGGTCATAAACATTTCTCATCATGATCACACAAATTTCTGTATCTCC**  
ATTTGTAGCAATATTGTAAGCAATGCAGTTCCATATTTCTGTGGTGGATGCTCTGATTTTCATATAGT  
ATACAGTGTACTTTTACTTTAGATTAATTACTGACCATTCCATTTATTGTAATACATACTGATTTTGAACCT  
GTAAGTGTTCACAATTGTGAACCAAGATGGCTTCTAATTAACATGGCTTTTGGTTTTAGAACTACAGG  
CTATTAAGTGTGTGCGCCGAAAAGCTATTATTGAGGAAGCCAGAAAGCTAATGGACTACTTGGAAAAGA  
GAGTTACTGAAGAACTGTAAGTAGAATATTTTTAAATGGAGTATTAGGATTAATTTGAGCATTAAATTT  
CTTTCCTAAAATATATGTCGTATATATACACACAAATATTAATTAGATGTTTAATACCACCAAGGTTTCC  
GTAAACAAGCAGGAAGCAAAGGATGGTGTTCATCATCACTTCTATCCCTGCTAATCTCGTAACACCTG  
GAAGAAAGAAGCTCAACCACCATGAAATGACTTCATGATATTTCTAAATCTATGGTGACATGACACTGC  
TATTGTAGT**GATTATCAATTCCTTGTTCACATCTCTGAGGGGTCAGAAAACTTTACTGAGAATGTTTT**  
GTTTGTGGAATTTATCGCACATGTAGTATGGGATCATCAGGGATATTATATATGAGGTCTCGTGTACAGT  
TAAAGCTTGCCTGTGATTTCTGTATGGATACCCTGGGAAATCCTTACTTGGGA**ACGTTTGATTTA**  
**ATAAACATGAAATAGTTTCAGACTTGTGGCATGAGTCA**

**Mutated R2:**

CTCTTTCCCTCCATACTGGGGTTCATTGATAGTGTTTCATACCTTTAAACGTCTTCTTTCTTTCTTAGTGTT  
ACCATGTCAGGTAAACCTAACTACTAAATGAGCGTCTCCTTTAAGGATTCATTCATGGTTGTGGGTTCCCT  
TTCAAAGCAGGAGGTGATAAATGGGCAAATTTGCCCAAAGTTATACTTACTGTTTTGGGGGAAGTTCTG  
ATTTTTATAGCATGGCTTTCTCCATAATCAGATTTCTTTTGGACAGTGACTAAGCAGTGCAGCAAGTGG  
AGGTGGTTCGGTGTCTTCTGACTCCTTGTGCTTCTGCATTATTGAACTGTAATTATTCTTTTCCCTGTGG  
ACAATTACAATGGTAAGACAAGGCCCATCAGCATGATGAGGCAAACCTGTAAGTGAAGATAACAGTAT  
ATTGAGAATTAGCTACTGTTTTCAATGCATCCTATCGAGTCTTCTCAGCCTCTTTGAACTTGGCCAAGTA  
CATTTATATAGTTATTCTGGAATTAATTAAGTGTGTACGCTCAGATTCATTTTCTGGGTTGTTGTTAAT  
GCCTTGTGTTCTGTTGAATTTCTTTCATCCAGGCTAATTGATATAGGTCCAAACAGCCGCGTGGAAAGA  
ATTTATTCCATGTTCTGTAATACTTGGTGTACACTGGGATACATGTATGCAGAGCAGCGAGTTTGAAGTG  
CTTCTGAGTTCGTTGGGATCAGGCTGTAGTCTTGTGGGGGAAGCTTTTCAAATCACACTGCAGGTTTG  
AGGTAGCTGTTAGTCTAATCCTCAGTCAGGGCTGCACTTCTGAGTACTCTCCATTCTCTGTGTATGGTA  
ATACTGCAGACTGCTCAGACATCTCCCCCGCCCTGTCTTCTCCAACCTTTCTGTTTCTCCCTCCTCTTCC  
TTTCTTCTCCTTCTCCTCTGTGCATCATCTTTAACTTCTTCATATTTTCTTCTTCTTCCCTTCTCCCCACAC  
CCACTCGAGTGTGTACGCATTTCCCTATTCTGCCTATAAGATTTTGTATTATATCCAGATTGCACAGTATA  
GCATCACCATAACAGTCATGCTTCTCCAGTCTCTTCTTTGTTTTCTTACCAAAATATTAGTCTTTCTACTG  
AGCCATAGGCATTAAGATTCATTTCACTTGCATAGCTCAGCAAGTTGGTCATCAGTTCTAATGCTAAAGT  
TTTGGGCTGTTTCTGGTCTGCATTCACTTAAAGTATTGAAATATGAAAGAAATAATTAATAGTTTTA  
TCATTTTCTATAACCACATGTCACAAGAGTTTGTATATAGCAAGTATCTCTCTCTGTGGCCCTGGCTAG  
CCTGGAGCTCACTATGCAGTGGCTTTACTTGAACCTGCACTGATCCTCCTGCCACTATTTTCGAATGCTG  
AAAGTATAGGTACATTTCCACCAAGGTACTCTGCTTAGTGCAACAGGTTTGTAGTGTGTCCAAAGCC  
GTTTATAGTAGAACCTTCCGTTCATGGTTCATAAACATTTCTCATCATGATCACACAAATTTCTGTATCTCC  
ATTTGTAGCAATATTGTAAGCAATGCAGTTCCATATTTCTGTGGTGGATGCTCTGATTTTCATATAGT  
ATACAGTGTACTTTTACTTTAGATTAATTACTGACCATTCCATTTATTGTAATACATACTGATTTTGAACCT  
GTAAGTGTTCACAATTGTGAACCAAGATGGCTTCTAATTAACATGGCTTTTGGTTTTAGAACTACAGG  
CTATTAAGTGTGTGCGCCGAAAAGCTATTATTGAGGAAGCCAGAAAGCTAATGGACTACTTGGAAAAGA  
GAGTTACTGAAGAACTGTAAGTAGAATATTTTTAAATGGAGTATTAGGATTAATTTGAGCATTAAATTT  
CTTTCCTAAAATATATGTCGTATATATACACACAAATATTAATTAGATGTTTAATACCACCAAGGTTTCC  
GTAAACAAGCAGGAAGCAAAGGATGGTGTTCATCATCACTTCTATCCCTGCTAATCTCGTAACACCTG  
GAAGAAAGAAGCTCAACCACCATGAAATGACTTCATGATATTTCTAAATCTATGGTGACATGACACTGC  
TATTGTAGT**GAGTAGCATTTGCTGGTGCACATCTCTGAGGGGTCAGAAAACTTTACTGAGAATGTTTTG**  
TTTGTGGAATTTATCGCACATGTAGTATGGGATCATCAGGGATATTATATATGAGGTCTCGTGTACAGTT  
AAAGCTTGCCTGTGATTTCTGTATGGATACCCTGGGAAATCCTTACTTGGGAATGTGTGGTTAAAG  
AAGCATGAAATAGTTTCAGACTTGTGGCATGAGTCA

**In Situ Hybridization:** A probe containing nucleotides 397-892 of *Xlr4b* sequence (NCBI GeneBank acc: NM 021365) was amplified using 5'GGAAGA GAA AGT ATG GGG TGA3' and 5'GGA TCC TAA TAC GAC TCA CTA TAG GGA G TGA AGT CAT TTC ATG GTG GTTG3' and that recognizes *Xlr4b*, *4a*, *4c*

and 4E was used and in situ hybridization was performed as described (Nieto et al., 2004. *J Comp Neurol* 479, 168).

**shRNA resistant forms:** shRNA resistant forms were generated introducing silent mutations in the coding regions targeted by the shRNAs. Sequence for mutated *Xlr4b(mXlr4b)*: ATGGCCAGCAAGATCAAAGGCAGGCCCTAAGCAGCCAAAAGTGACCCCCGCTCTGCC TTCCAACGACTCTCAGCAGCTCCACGAGAATAACCCAGGAAATAACCTGGCACTCGAAACATGCGGGG AGTCTTCCAGTAGCCACGGAAGTGGCGGACCCAAGCCTGGGCCATCTAAAAAGACCCTGAATGAAAGA AAACGGAAGTACGGTGTCAAGTGTGAACAAAACAGTCCAGAATATTGAGTGGAAACGTGGATCACTTCCTC AAGGTCCAGCATGAACGCCGACAGGAGCTGTATAAAGACTACTCACACCAGTTCCTGACCCTCGTGATG ATGTGGAATATCGAcGTCGAtCAGATTAAGAAACAGGCCGGGAAGCTCAGCGATATCCTGGACGAACAG CAGAAACTCTTCCAGCAGTTTCAGTCCATTCATATGCAGAAGATCGAGGAGTTCAAGGAGCTGTGCGAT AGGCACCTCAAGAACCTGCAGGCCATCAAGTGCTGTAGACGGAAGGCAATCATTGAAGAGGCCCGCAA GCTCATGGACTATCTGGAAAAGAGAGTGACCGAGGAGACAGTCCATGTGAATAAGCAGGAGGCTAAGG ATGGAGTGCAGTCTAGTCTGCTGTCTCTGCTGATCAGCTGAACCCAGCTTTCTTGTACAAAGTGGTCCCC GAATTC;

mutated *Cux1(mCux1)*: ATGGCCGCTAACGTGGGCTCCATGTTCCAGTACTGGAAGAGGTTTGACCTGCAGCAGCTGCAGAGAGAG CTGGATGCTACAGCCACTGTGCTGGCCAATAGACAGGACGAGAGCGAACAGTCCAGGAAGAGACTGAT CGAGCAGTCCCGGGAATTCAAGAAAAACACACCTGAAGACCTGCGCAAACAGGTGGCCCCACTGCTGA AGTCTTCCAGGGCGAGATTGATGCTCTGTCTAAAAGGAGTAAGGAGGCCGAAGCCGCTTTTCTGACCG TGTATAAGAGACTGATCGACGTGCCAGATCCTGTGCCAGCCCTGGACGTGGGACAGCAGCTGGAGATTA AAGTGCAGAGGCTGCACGATATCGAGACCGAAAATCAGAACTGAGAGAGACACTGGAGGAATACAAC AAGGAGTTTGCCGAAGTGAAGAACCAGGAAGTGACAATTAAGGCTCTGAAAGAGAAGATCCGGGAGTA TGAACAGACTCTGAAGTCCCAGGCCGAGACCATCGCTCTGGAGAAAAGAACAGAAGCTGCAGAACGACT TCGCCGAGAAAAGAACGCAAGCTGCAGGAAACCCAGATGAGCACACATCCAACTGGAGGAAGCCGAG CACAAGCTGCAGACTCTGCAGACCGCTCTGGAGAAGACCCGGACAGAACTGTTTGACCTGAAAACAAA GTACGATGAGGAAACTACCGCTAAGGCCGACGAGATCGAAATGATTATGACTGATCTGGAGAGGGCTA ATCAGAGGGCTGAAGTGGCTCAGAGGGAGGCTGAAACCCTGAGGGAGCAGCTGAGCTCCGCTAACCAT TCTCTGCAGCTGGCCAGTCAGATTCAGAAGGCTCCTGACGTGGAGCAGGCCATCGAAGTGCTGACCCGG TCTAGTCTGGAGGTGGAAGTGGCCGCTAAGGAGCGCGAAATTGCCAGCTGGTGGAGGATGTGCAGAG GCTGCAGGCCAGCCTGACCAAGCTGAGAGAAAATTCTGCTAGTCAGATCTCTCAGCTGGAGCAGCAGCT GAACGCGAAAACAGTACTCTGAAGCAGCTGGAGGAAAACCTGAAGGGACAGGCTGACTACGAGGAA GTGAAGAAAGAGCTGAACACTCTGAAGTCTATGGAGTTCGCCCCTAGTGAAGGAGCTGGGACTCAGGA TAGCACCAAGCCACTGGAGGTGCTGCTGCTGGAGAAGAACCAGTCTCTGCAGAGTGAGAATGCCACCCCT GCGCATTAGCAACTCCGACCTGTCCGGCCCCCTATAGCACAAATTCCATCAGCTCCCCAAGCCCTCTGCAG CAGTCCCCTGATGTGAACGGAATGGCCCCATCTCCAGTCAGAGCGAGTCCGCTGGGTCTATTAGTGAA GGCGAGGAAATTGACACAGCCGAGATCGCTCGGCAGGTGAAAGAACAATAATTAAACATAATATTGG ACAGCGCATCTTCGGGCATTACGTGCTGGGCCTGTCCAGGGAAGCGTGTCCGAGATCCTGGCCAGGCC TAAACCATGGAATAAGCTGACCGTGAGAGGCAAGGAACCATCCACAAAATGAAGCAGTTTCTGTCTGA CGAGCAGAACATTCTGGCCCTGCGGAGTATCCAGGGCCGCGAGAGGGAACCCAGGACAGAGCCTGA ATCGCCTGTTTCAGGAAGTGCTAAGAGGAGAAACGGGTCCGAGGGCAATATTACAACCTAGGATCAGA GCTTCTGAGACAGGAAGTGATGAAGCCATCAAAGCATTCTGGAGCAGGCTAAGAGGGAACTGCAGGT GCAGAAAACCTGCCGAGCCCGTGCAGACATCTAGTACTAGTCTCTGGGAACAGCGACGATGCTATCAG ATCCATTCTGCAGCAGGCTAGGAGGGAGATGGAAGCTCAGCAGGCCGCTCTGGACCCTGCCCTGAAGCC AGCTCCTCTGTCCAGCCAGATCTGACCATTCTGACACCCAAGCATCTGTCTGCCAGTCCTATGTCTACT GTGAGTACCTACCCCCCTCTGGCTATCTCTCTGAAGAAAACCCCTGCCGCTCCAGAACTTCTACCGCCG CTCTGCCAAGTGCTCCTGCCCTGAAGAAAGAGGCCAGGACGTGCCACACTGGATCCACCAGGATCTG CTGACGCTGCTCAGGGCGTGTGCTGAGGCCTATGAAGAGCGAGCTGGTGCAGCGGCTCCACTTGGAAAGATC CATGGTGGAGCCCAATCCAGCCCGAGAGGAGAAATCTGACTAGTAGCGAGGAAACCAAGGCCGACGAG ACCACAGCTTCTGGCAAAGAAAGGGCTGGATCCTCTCAGCCTAGGGCTGAGCGCAGCCAGCTGCAGGG ACCAAGCGCCTCCGCCGAGTACTGGAAGGAATGGCCAAGCGCCGAATCCCCCTATTCTCAGAGTAGCGA GCTGAGCCTGACAGGCGTTCTAGGAGTGAGACTCCTCAGAACTCCCCACTGCCCTCCTCTCCTATTGTG CCAATGGCCAAACCCGCTAAGCCTAGCGTGCTCCACTCACACCAGAGCAGTATGAAGTGTACATGTAT CAGGAGGTGGACACAATCGAACTGACTAGGCAGGTGAAAGAAAAGCTGGCCAAGAATGGAATTTGCCA GAGAATCTTCGGGGAGAAAGTGTGGGACTCTCTCAGGGAAGCGTGTCCGATATGCTGTCTAGGCCTAA ACCATGGAGTAAGCTGACCCAGAAAGGGAGGGAACCCTTCATCAGAATGCAGCTGTGGCTGAACGGAG

AGCTGGGACAGGGAGTGCTGCCAGTGCAGGGACAGCAGCAGGGACCCGTGCTGCACAGTGTGGCTAGC  
CTGCAGGACCCACTGCAGCAGGGATGCGTGAGTAGCGAGTCCACACCCAAGACTTCTGCCAGTTGTAGC  
CCCCTCCTGAGTCTCCCATGTCTCTAGTGAGTCCGTGAAGTCTCTGACTGAGCTGGTGCAGCAGCCAT  
GTCCCGCCATCGAGACCAGCAAAGAAGGCAAGCCACCTGAGCCATCCGACCCACCAGCTTCCGATTCTC  
AGCCTACTACCCCTCTGCCACTGAGTGGACACAGCGCtCTGTtATTcAGGAGCTGGTGGCTATGAGCCCC  
GAGCTGGACACCTACGGGATCACAAAAAGGGTGAAGGAAGTGTGACCGATAACAATCTGGGGCAGAG  
ACTGTTTCGGCGAGACAATCCTGGGCCTGACTCAAGGAAGTGTGAGCGATCTGCTGGCCAGGCCCAAGCC  
TTGGCATAAACTGTCCCTGAAGGGCCGGGAGCCATTTGTGCGCATGCAGCTCTGGCTCAACGACCCCAA  
CAATGTGGAAAACTGATGGATATGAAGAGAATGGAGAAGAAAGCCTACATGAAGCGGCGCCACAGCT  
CCGTGTCCGACTCTCAGCCTTGCAGCCTCCAAGCGTGGGGATTGATTATAGCCAGGGAGCTTCCCCAC  
AGCCACAGCATCAGCTGAAGAAACCTCGGGTGGTGTGCTGGCTCCAGAGGAAAAAGAGGGCCCTGAAGCGC  
GCTTACCAGCAGAAACCTTATCCAAGCCCCAAGACCATCGAGGAACTGGCCACACAGCTGAATCTGAAG  
ACATCTACTGTGATTAAGTGGTTCCACAATTATCGGAGCCGCATCAGGAGAGAGCTGTTTATCGAGGAA  
ATTCAGGCTGGATCCCAGGGACAGGCTGGAGCTAGTGACAGCCCATCCGCTAGGTCTAGTAGAGCCGCT  
CCTAGCTCCGAAGGAGACAGCTGCGATGGGGTGGAGGCCACAGATGCTGAGGAACTGGCGGAAACAT  
CGTGGCTACTAAGTCCCAGGGAGGACTGGCTGAGGTGGCCGCTGCCCCAGCTGACAGAGAGGGAAGCCA  
CTCAGCCCCTGAGAAAGCTAAGGCTCAGCCACTGTGCTCCGGAACCCCTGGACAGGACGATGGAGAA  
GACGCCTTAGGCCTAGACCACTGCCAGAGGGACTGGCTGATGCTCCTGCTCCAGTGCCATCTCTGGCT  
GCTCCAGCTGCTGGAGAGGATGCTGCCACCAGCGCCACAGCTCCAGCTACCGCTACAGAAGCTCCAGGA  
GCTGCTAGGGCTGGACCTGCTGAGAGATCTAGTGCTCTGCCATCTACCAGTGCCCCAGCTAATGCTCCA  
GCTCGGCGCCCTAGCTCCCTGCAGAGCCTGTTCCGACTGCCAGAGGCTGCTGGAGCTAGGGACAACCTG  
GTGAGAAAGAAAAAGGCTGCCAACCTGAATAGCATCATTcATCGGCTGGAGAAGGCTGCCTCCCGCGA  
GGAACCCATCGAGTGGGAATTTTgAGCGGCCGCTAAACTAT. mutated *Cux1(mCux2)*:  
ATGGTAGCTCCGGTGTGAAGAGCTTCCAGGCTGAGGTGGTGGCTCTCAGTAAAAGAAGTCGGGAGGC  
AGAGGCGGCGTTCCTGAGTGTtATAAGCAATTGATTGAAGCACCAGACCCTGTCCATCATTtGAGGT  
GGCGCGGACTCTAGACGACAGACTGCAGCGTCCCAGCTTTGACCCAGTGGGCAGCGCCTACAAGACGT  
GCACATCGCGTGAAGAGGTGCCAGAGCCACCCAGTGCCAGAGAGCAGAACGAGGGGACGTGTCCCA  
CGGGGCACACGCCAGCCAACGGTAACCACCTGCCAGGTCCCAGGACACCCTCGTGACAGACACCTTGC  
TGCAGAAGAATGAGGCCGAGAGACAGAAGGGTCTCCAAGAAGTCCACATCACCTTGGCAGCCAGGCTG  
GGGGAGGCAGAGGAGAAAATCAAGGTGTTACATTcAGCGCTAAAGGCCACACAGACAGAGCTGCTGGA  
GCTGAGGAGGAAATACGATGAGGAGGCTGCTTCCAAGGCCGATGAGGTCGGCTTGATCATGACGAACC  
TGGAGAAGGCCAACCAGCGAGCAGAGGCTGCCAGCGTGAGGTGGAAAGCCTTCGGGAGCAGCTGGCG  
TCAGTCAACAGCTCCATTcGCCTGGCTTGTGTTCCCCCAGGGACCCAGTGGGGAGAAGGTGAGCTTT  
GCTCTGTGTTcAGGGCCGCGGCTGGAGGCAGCTCTGGCCTCCAAGGACAGAGAGATCCTGAGGCTGTTG  
AAGGACGCCCAGCAGCTTcGACATTCCCTGCAGGAGCTGGAGGAGGTCTCAGCCAACCAAATCGCTGAC  
CTGGAGCGGCAGCTAGCTGCCAAGTCCGAGGCCATAGAGAACTCCAAGAAAAGCTCGAGGCCCAGGC  
CGATTACGAGGAAATCAAGACAGAGCTGAGCATCCTGAGAGCCATGAAGCTGGCCTCCAGCACCTGCA  
GCCTCCCACAGACGCTGGCCAAGCCTGACGACCCGCTGCTTGTGGCCAAGGATGTCTTCTTCCCCACAC  
AGAAGTTCTACTGGAGAAGCCTGCGCTGCTGGCCAGCCCTGAGGAAGACCCCTCGGAGGATGACTCCA  
TCAAGGGCTCACTGGGCACGGAGCCCCCTACCCTCCTCAGCTTCCACCTCCGCCAGGCCCCGGAAGACC  
CGCTGTCCCCAAGCCCTGCGCAGCCCCTGCTGGGCCCCAGCCTGGGTCTGATGGGCCAAGGACTTTCTC  
GCTGTCCCCCTTCCCCAGCCTGGCCCCGGGGGAGAGGCTGGCTGGGGACTCACTGCTATCCAAACATAT  
GATGGGCCCAGCTGCCTTCAAAGGGGAGACGGGAAACCTGCTGGCATTCCCCCGACTTTCTACGGTGG  
TGCCAAGCCTCCATCAGCTCCTGCTGCCTCCGTGCCCTGCCCGAGCCACAGGGGCCCGGAGGCTGT  
GGATGGGGCTGGGCCAGAGGAGGAGCAGCTGGACACGGCTGAGATCGCCTTTCAGGTGAAGGAGCAAC  
TTCTCAAGCACAAcATTGGCCAGCGCGTGTtTGCCACTATGTGCTGGGACTGTcGCAGGGCTCGGTGA  
GTGAGATCCTGGCCCCGCCAAGCCGTGGCGTAAGCTCACGGTGAAGGCAAGGAGCCCTTCATCAAG  
ATGAAGCAGTTCTGTGGATGAGCAGAATGTGCTGGCCCTGCGCACCATCCAGGTGAGGCAGCGAGGC  
AGCATCACCCCGAGAATCCGCACACCTGAGACAGGCTCGGACGACGCCATCAAGAGCATCCTGGAGCA  
GGCCAAGAAGGAGATAGAGTCTCAGAAGGGGGGTGAGTCCAAGAActCCCCAGCCTCCGTGAGCATCC  
CCAACGGCACAGCCTCCTCCAGCACCTCGGAAGATGCCATCAAGAActTCTGGAACAAGCCCCGCCGAG  
AAATGCAAGCCCAGCAGCAGGCCCTGCTGGAGATGGAGTCGGGTCCCAGGGGCCGCTCAGTGCCTCCCT  
CTCCTCCGGAGCGGCCCTCGCCAGCCACTGCGAGCCAGAATGGGGCCCTGACCTGCGTGAAGCAGGAA  
GATGGCGGTGGTGGCAGCGGCAGCAGCAGCACTGTGCAGGCGCCGCTTGTGTCTTGTCCCCGCTGCA  
TTTGTGCAGCGGATCATCCGCAAGGTGAAGTcGGAGATCGGCGATGCCGGCTACTTTGACCACCACTGG  
GCATCAGACCGTGGTTTGTCTAGCCGTCCCTATGCCTCCGTGTcGCCCTCCCTCTCCTCCTCCAGCTA  
CTCCGGACAGCCCAATGGGCGAGCCTGGCCTCGTGGGGACGAGGCAACCATCGCCCCCTGAGGACGAAG

CAGCTATGGGCGAGGACGAGGCCCCAGGGTGGGAGAGCTCAAGGCCGAGGCCGGAGCCCCGGAGGTG  
GGCGGCGGGCGACTGCCCTACTATCCAGCATACTGCCCCGCACACTCAAACCCACTGTGCCGCCCTG  
ACACCCGAGCAGTATGAACTGTACATGTACCGGGAGGTAGACACGCTGGAGTTGACACGCCAGGTCAA  
GGAGAAGCTAGCCAAGAACGGCATCTGCCAGCGCATCTTTGGGGAGAAGGTCCTGGGACTGTCTCAGG  
GTAGCGTGAGTGACATGCTGTACGGCCAAAGCCATGGAGCAAGCTGACACAGAAGGGCCGGGAGCCT  
TTTATCCGGATGCAGTTGTGGCTGTTCGGACCAGCTGGGCCAGGGCCAGGGCCAAGCCCCAACCCAGCAG  
CCCAGCGCTAGCCAAGCCAGTCCCACGGAGCCAACCTCCTCCCCATCGCCTCCCCCAAGCCCCACGGAG  
CCTGAAAAGACGTCCCAGGAGCCTCTGGGCCTGTGCTGGAAAGCAGCAAGGAGAATCAGCAGCCCCGA  
AGGCCGGGCCAGCTCCTCCCTGGGTGGGAAGCCCTTCTCAAGCAGCCAGGCTGCGGGGGGCATCCAGG  
AGATGGTGGCCATGTCCCCAGAGCTGGACACATACTCCATCACCAAGAGAGTCAAGGAGGTCCTCACCG  
ACAACAACCTAGGGCAGCGGCTGTTTGGTGAGAGCATCTTGGGGTTGACCCAGGGCTCCGTGTGATC  
TGCTGTGAGGCCCAAGCCCTGGCACAACTGAGCTTGAAGGGCCGGGAGCCCTTTGTGCGTATGCAGC  
TGTGGCTGAGTGACCCCCACAACGTGGAGAAGCTTCGGGACATGAAGAAGCTGGAGAAGAAAGCCTAT  
CTGAAGCGCCGCTATGGGCTCATCGGCACCGGCTCGGACAGCGAGTCACCGGCTGCGCACTCCGAGTGC  
CCCAGCCCCGTGTTTGCAGCCCCAGGAGTTGAGTCTCATGCAGGCCAAGAAGCCCAGGGTGGTGCTGGCG  
CCCGCCGAGAAGGAGGCTCTGCGGAAGGCCTACCAGCTCGAGCCGTACCCCTCGCAGCAGACCATAGA  
GCTGCTCTCCTTCCAACCTCAACCTCAAGACGAACACCGTCATCAACTGGTTCCACAACCTACAGGTCCAG  
GATGCGCCGTGAAATGCTGGTGGAGGGGACACAGGATGATCCTGACTTTGACCCGAGTGGGGGTCCCA  
ATGTCCTGACGCCAGGCCACACCCACAGAGAGCCCACCCACAGAGCCCCGACTCAGAGACTGAGGAC  
CAAAAGCCCCCATGAAGAGCTTAGAGCTGCAAGAGCCTGAGGGTCCCCTACAGCGAGCTGCCCCAGA  
CAGGGCTCTGGTGAAGATCAAACAGGAAGAGGGTTTGGAGGTGGATGGAGACAGCCAGCCCCAGGATG  
TGGGGGATCCAGACCGAGGGCAAGATGGCCCCAAAGAGGAGCATAACCACCCTCTGGGAAACAGTGAC  
CTCTCAGAGCTGGCCCCAGGGCCCTTTCTTTTCAGGCACACCCAACCCCGATTGCCCTCCTTGCACAACC  
CCCAAGAAAAGGGGACTGGGGAACAGGTTCACTCAGAGCCTCTGAGTTTCAAGTCCACCTCCGAATCCT  
CCTGCTGCAGCCTGGAGGGGGCCACCGAACTCTCCCTCTGTCATCTCCTCGCCAGACCTCACGACATGTGT  
GTCACCTGCCCTTCCCTCCTCAGCCCCATCTCCCATCCTTACCTGGTGCCCCACCTGCCAAAGTGCCG  
AGTACCAGCCCCACTGGTGACACAGCCGAGCCTTGCACCCAGCACTAAGGTGAACCCCAACTTGCA  
CGGCGGCATGAGAAAATGGCCAACCTTGAACAGTATAATCTACCGGCTGGAGAGGGCTGCCAACCGGA  
AGAGGTCCTGGAGTGGGAATTCTGAAGCTGGGGTTGAGGGACATAGCCCCAGAGGTCACCTTCCCTCTC  
TCCCTCCCTCCCTCTCCAGATGTGGTGGGGTCCAGAGAGGCAAGAATCAGCCATGCAGATGTGGACA  
ACAAAGTTAAGCCGTCTATGTGTAATGGTGCATCACTAGTTACCTGAAGTTGTGTGTGAGCAGATGCCG  
CCGCTCTTCTTTCTGATGGCCCTGCTCGTAGGAGGCGCTGGAATCCTGCCCTCATCCTCGCCCCGTGG  
GAAGGCAGGGCCAAAAGGTACCACATTCTCA
